# Supplementary material
Source: publisher site journal article supplement (https://www.dovepress.com/article/245843)
Supplement: Supplementary file 1 [file get_supplementary_file.php]

**Table S1:** The primers sequences and the predicted product size of PCR amplified products of *SH2B1* gene.

| **Exon** | **Forward primer** | **Reverse primer** | **Product size(bp)** | **Annealing temperature** |
| --- | --- | --- | --- | --- |
| 1 | AGTAGGGTCGGACGTCTCTG | CCAACAAAAAGTGAGCGACA | 1240 | 60 |
| 9 | ATTCCATCGGATCCTCTGTTC | CTATGGCCTCTTCCAATTCAA | 722 | 60 |

**Table S2:** Candidate *SH2B1* gene and polymorphisms of interest.

| **Gene** | **Chromosome** | **Exon** | **SNPs Ref.** | **SNP_ID** |
| --- | --- | --- | --- | --- |
|  |  | 1 | rs146946750 | G>A |
|  |  | 1 | c.827 C>G | C>G |
|  |  | 9 | rs565131715 | T>A |
| SH2B1 | 16p.11.2 | 9 | rs370302573 | C>T |
|  |  | 9 | rs143212778 | G>A |
|  |  | 9 | rs200470848 | T>C |
|  |  | 9 | c.2026 G>A | G>A |

**Table S3:** The amplification and sequencing reaction protocols.

| **Stage** | **Description** | **Temperature** | **Duration** | **Repeats** |
| --- | --- | --- | --- | --- |
| **Amplification protocol:** | | | | |
| 1 | Initial Activation Step | 95 oC | 10 minutes | 1 |
|  | Denaturation | 95 oC | 30 seconds |  |
| 2 | Annealing | 60 oC | 45 seconds | 35 |
| Extension | 72 oC | 45 seconds |  |
|  | Final extension step | 72 oC | 10 minutes | End of all reactions |
| 3 | End of cycling | 4 oC | infinity | 1 |
| **Sequencing reaction protocol:** | | | | |
|  | Denaturation | 96 oC | 10 seconds |  |
| 1 | Annealing | 50 oC | 5 seconds | 25 |
|  | Extension | 60 oC | 4 minutes |  |
| 2 | End of cycling | 4 oC | infinity | 1 |
